# Supplementary material for: Tin-based organic–inorganic metal halides with a reversible phase transition and thermochromic response
Source: Royal Society of Chemistry journal article supplement (doi:10.1039/d3qm00105a), 2023-01-01
Supplement: d3qm00105a1.pdf [file d3qm00105a1.pdf]

## Supporting Information

### Tin-based organic-inorganic metal halides with reversible phase transition and thermochromic response

Gele Teri, Hao-Fei Ni, Qing-Feng Luo, Xiao-Ping Wang, Jun-Qin Wang, Da-Wei Fu\* and Qiang Guo\*

Institute for Science and Applications of Molecular Ferroelectrics, Key Laboratory of the Ministry of Education for Advanced

Catalysis Materials, Zhejiang Normal University, Jinhua, 321004, People's Republic of China

E-mail: dawei@zjnu.edu.cn; qiangguo@zjnu.edu.cn

#### Experimental Section

##### Synthetic procedures

All reagents and solvents employed in this work are commercially available without further purification.

**(BPA)<sub>2</sub>SnCl<sub>6</sub> (1).** 3-chloropropan-1-ammonium hydrochloride (0.872 g, 4 mmol) and SnCl<sub>4</sub> (0.520 g, 2 mmol) were dissolved into about 5 mL hydrochloric acid and the mixture was stirred until the solution was completely clarified. Finally, the solution was left to evaporate slowly at room temperature to obtain colorless flaky single crystals.

**(BPA)<sub>2</sub>SnBr<sub>6</sub> (2).** Following synthesis procedures similar to those of compound 1, SnBr<sub>4</sub> (0.876 g, 2 mmol) and 3-chloropropan-1-ammonium hydrochloride (0.872 g, 4 mmol) were completely dissolved in about 5 mL hydrobromic acid. At room temperature, green flake crystals were obtained by slow evaporation.

**Materials and methods:** Dry crystals were ground into powders, and an appropriate quantity of powders was pressed into a thin sheet with a thickness of 5 mm. The process was carried out in a special mold under a pressure of 40 MPa. A simple capacitor was made by fixing the cut sheet on the electrode with copper wires and carbon glue. Finally, the electrode was connected to the Tonghui TH2828A instrument, and the temperature-dependent dielectric constant was tested at frequencies ranging from 5 kHz-1 MHz with AC voltage of 1 V. PerkinElmer diamond instrument was used for differential scanning calorimetry (DSC) measurement. A powder sample with a mass of about 10 mg was weighed and placed in an aluminum crucible, which was sealed with an accompanying pressure, and two heating and cooling cycles were measured at a rate of 20 K min<sup>-1</sup> in the range of 240-340 K under a nitrogen atmosphere. UV-near-infrared-visible (UV-NIR-vis) spectra were measured on a Cary RF 6000 instrument in the range of 200-800 nm. Firstly, BaSO<sub>4</sub> was used as a blank sample to perform a baseline correction. After that, a small quantity of

powders was taken for testing. Powder X-ray diffraction (PXRD) data was measured on the D8 Advance 03030502 instrument in the  $2\theta$  range of  $5 \sim 55^\circ$  with a step size of  $0.02^\circ$ . Thermogravimetric analyses (TGA) were carried out on a TA Q50 system with a heating rate of  $10 \text{ K min}^{-1}$ . For compounds **1** and **2**, Hirshfeld surfaces and 2D fingerprints were calculated using the CrystalExplorer software with input structure files in CIF format. Density functional theory (DFT) were performed with the Vienna Ab Initio Simulation Package (VASP).

**X-ray single crystal diffraction:** Single-crystal X-ray diffraction data were collected by using a Bruker D8 APEX-III diffractometer with *Mo-K $\alpha$*  radiation ( $\lambda = 0.71073 \text{ \AA}$ ) (operating at 50 kV and 40 mA). Data reduction and numerical absorption corrections were generated using APEX-III software. Refinement of single crystal data was solved and refined using SHELXT and OLEX2 software packages, all non-hydrogen atoms were anisotropically manipulated.

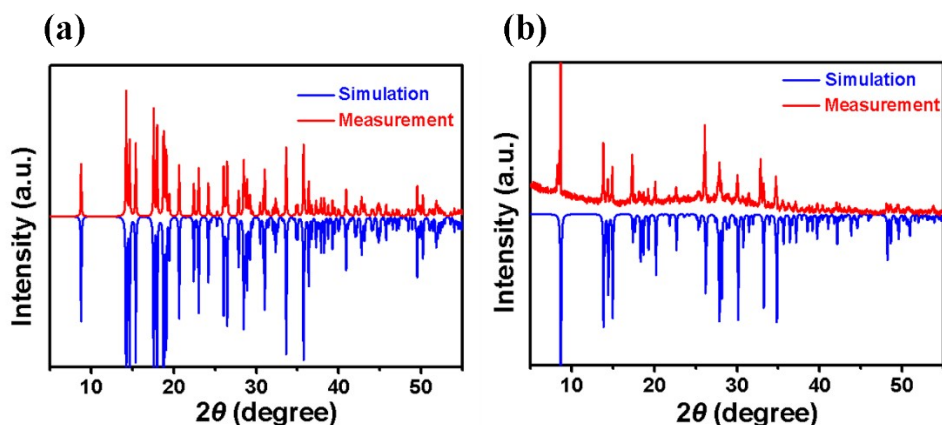

Fig. S1 Powder X-ray diffraction (PXRD) patterns for  $(\text{BPA})_2\text{SnCl}_6$  (**1**) and  $(\text{BPA})_2\text{SnBr}_6$  (**2**).

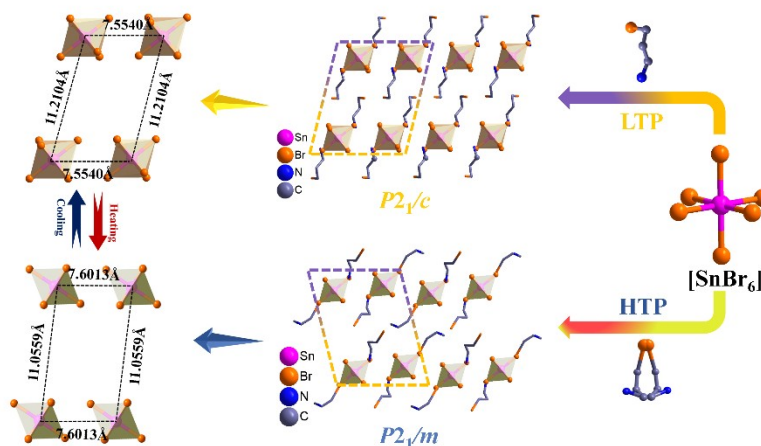

Fig. S2 Schematic diagram of the LTP and HTP structures in compound **2**. For clarity, all H atoms were omitted.

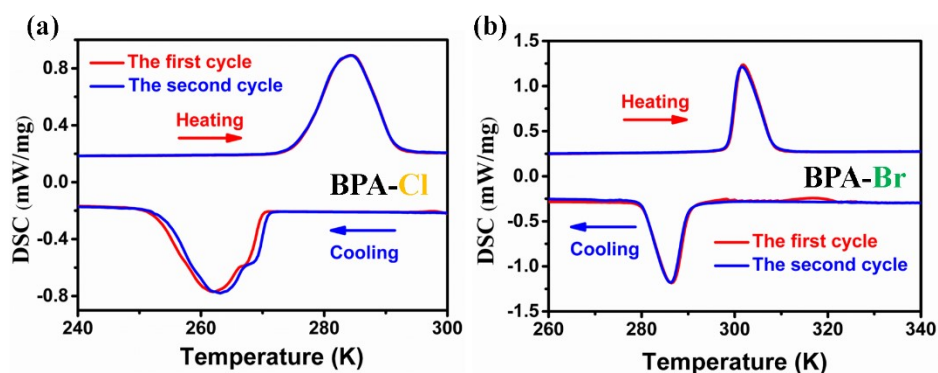

Fig. S3 DSC curves of 1 (a) and 2 (b) in a heating-cooling run at the first cycle and the second cycle respectively.

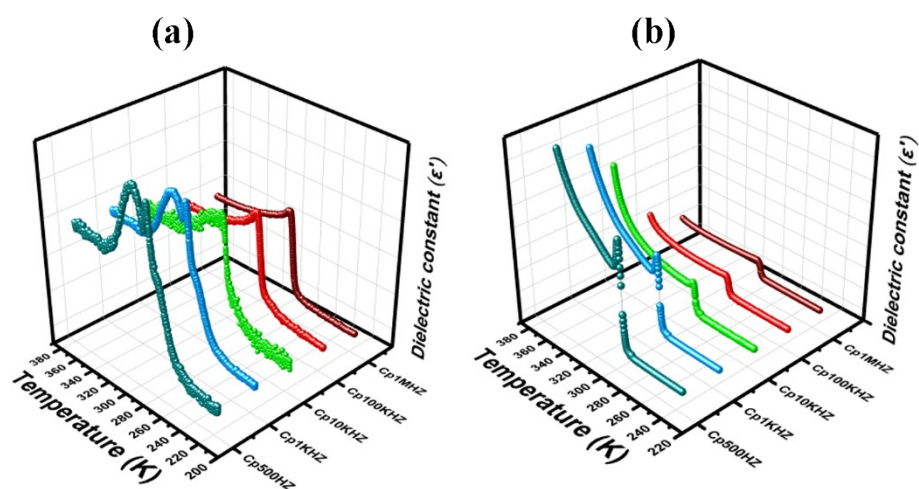

Fig. S4 The dielectric measurements of 1 (a) and 2 (b) at 500Hz, 1KHz, 10KHz, 100KHz and 1MHz upon heating.

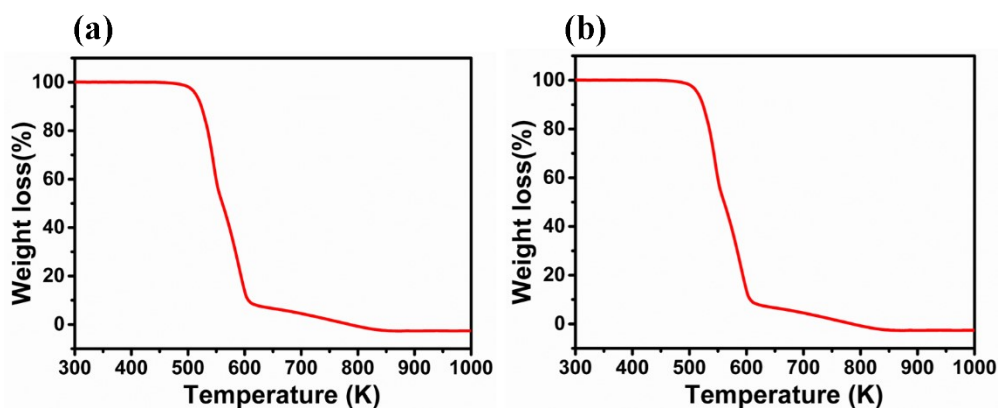

Fig. S5 TGA curves of 1 (a) and 2 (b) in the temperature range of 300-1000K.

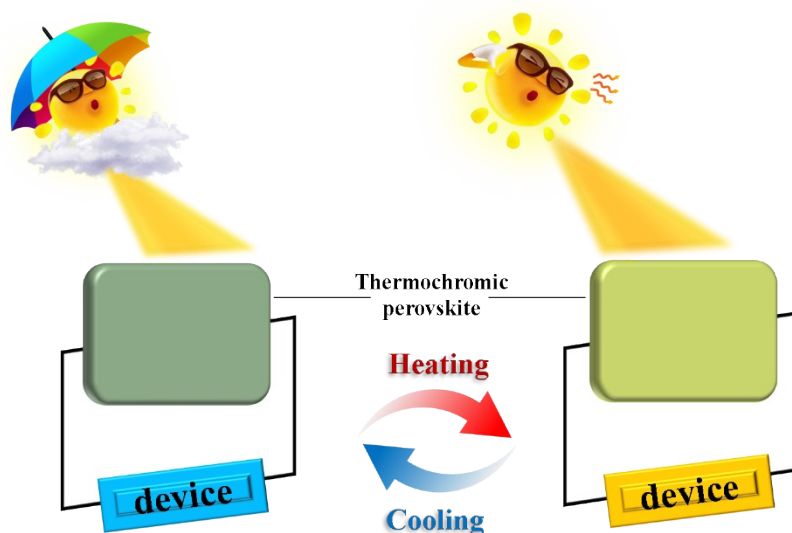

Fig. S6 The schematic of color-change smart window.

Table S1 Crystallographic data and structural refinement details of compound 1

| Compound                                            | (BPA) <sub>2</sub> SnCl <sub>6</sub>                                             |                                                                                  |
|-----------------------------------------------------|----------------------------------------------------------------------------------|----------------------------------------------------------------------------------|
|                                                     | LTP                                                                              | HTP                                                                              |
| CCDC Code                                           | 2231652                                                                          | 2231653                                                                          |
| Formula                                             | C <sub>6</sub> H <sub>18</sub> Br <sub>2</sub> Cl <sub>6</sub> N <sub>2</sub> Sn | C <sub>6</sub> H <sub>18</sub> Br <sub>2</sub> Cl <sub>6</sub> N <sub>2</sub> Sn |
| Fw                                                  | 481.71                                                                           | 609.43                                                                           |
| Temp(K)                                             | 273.0                                                                            | 300.0                                                                            |
| Crystal Syst                                        | Monoclinic                                                                       | Monoclinic                                                                       |
| Space group                                         | <i>P</i> 2 <sub>1</sub> / <i>c</i>                                               | <i>P</i> 2 <sub>1</sub> / <i>m</i>                                               |
| <i>a</i> (Å)                                        | 10.715(5)                                                                        | 11.040(3)                                                                        |
| <i>b</i> (Å)                                        | 7.267(2)                                                                         | 7.3622(15)                                                                       |
| <i>c</i> (Å)                                        | 12.829(5)                                                                        | 12.282(3)                                                                        |
| <i>α</i> <sup>o</sup>                               | 90                                                                               | 90                                                                               |
| <i>β</i> <sup>o</sup>                               | 109.487(6)                                                                       | 105.063(6)                                                                       |
| <i>γ</i> <sup>o</sup>                               | 90                                                                               | 90                                                                               |
| V(Å <sup>3</sup> )                                  | 941.8(6)                                                                         | 964.0(4)                                                                         |
| Z                                                   | 2                                                                                | 2                                                                                |
| <i>μ</i> (mm <sup>-1</sup> )                        | 6.434                                                                            | 6.286                                                                            |
| GOF on <i>F</i> <sup>2</sup>                        | 1.039                                                                            | 1.053                                                                            |
| <i>R</i> <sub>1</sub> [[ <i>I</i> > 2σ( <i>I</i> )] | 0.1289                                                                           | 0.1576                                                                           |
| <i>wR</i> <sub>2</sub> (all data)                   | 0.2076                                                                           | 0.3278                                                                           |

**Table S2** Crystallographic data and structural refinement details of compound **2**

| Compound                                                     | (BPA) <sub>2</sub> SnBr <sub>6</sub>                             |                                                   |
|--------------------------------------------------------------|------------------------------------------------------------------|---------------------------------------------------|
|                                                              | LTP                                                              | HTP                                               |
| CCDC Code                                                    | 2231654                                                          | 2231655                                           |
| Formula                                                      | C <sub>6</sub> H <sub>18</sub> Br <sub>8</sub> N <sub>2</sub> Sn | C <sub>3</sub> H <sub>9</sub> Br <sub>8</sub> NSn |
| Fw                                                           | 876.19                                                           | 737.17                                            |
| Temp(K)                                                      | 240.0                                                            | 333.0                                             |
| Crystal Syst                                                 | Monoclinic                                                       | Monoclinic                                        |
| Space group                                                  | <i>P2<sub>1</sub>/c</i>                                          | <i>P2<sub>1</sub>/m</i>                           |
| <i>a</i> (Å)                                                 | 10.886(8)                                                        | 11.0559(15)                                       |
| <i>b</i> (Å)                                                 | 7.493(5)                                                         | 7.6425(6)                                         |
| <i>c</i> (Å)                                                 | 13.119(8)                                                        | 12.6907(15)                                       |
| $\alpha$ /°                                                  | 90                                                               | 90                                                |
| $\beta$ /°                                                   | 110.449(13)                                                      | 105.813(13)                                       |
| $\gamma$ /°                                                  | 90                                                               | 90                                                |
| V(Å <sup>3</sup> )                                           | 1002.7(12)                                                       | 1031.7(2)                                         |
| Z                                                            | 2                                                                | 2                                                 |
| $\mu$ (mm <sup>-1</sup> )                                    | 17.200                                                           | 14.766                                            |
| GOF on <i>F</i> <sup>2</sup>                                 | 1.057                                                            | 0.956                                             |
| <i>R</i> <sub>1</sub> [[ <i>I</i> > 2 $\sigma$ ( <i>I</i> )] | 0.1478                                                           | 0.1984                                            |
| <i>wR</i> <sub>2</sub> (all data)                            | 0.2368                                                           | 0.3662                                            |

**Table S3** Selected bond lengths /Å and angles/° for compound **1**

| Compound <b>1</b>        |            |                      |           |
|--------------------------|------------|----------------------|-----------|
|                          | LTP        |                      | HTP       |
| Sn1-Cl1                  | 2.4538(18) | Sn1-Cl1 <sup>1</sup> | 2.455(4)  |
| Sn1-Cl1 <sup>1</sup>     | 2.4537(18) | Sn1-Cl1              | 2.455(4)  |
| Sn1-Cl2                  | 2.4501(16) | Sn1-Cl2              | 2.449(7)  |
| Sn1-Cl2 <sup>1</sup>     | 2.4501(16) | Sn1-Cl3 <sup>1</sup> | 2.446(4)  |
| Sn1-Cl3                  | 2.4462(16) | Sn1-Cl3              | 2.446(4)  |
| Sn1-Cl3 <sup>1</sup>     | 2.4462(16) | Sn1-Cl4              | 2.441(6)  |
| Br1-C1                   | 1.926(10)  | Br1-C1               | 1.75(4)   |
| N1-C3                    | 1.502(9)   | N1-C3                | 1.53(2)   |
| C1-C2                    | 1.497(11)  | C1-C2                | 1.49(2)   |
| C2-C3                    | 1.518(10)  | C2-C3                | 1.520(14) |
| Cl <sup>1</sup> -Sn1-Cl1 | 180.0      | Br2-C4               | 2.00(2)   |

|                                        |          |                                        |            |
|----------------------------------------|----------|----------------------------------------|------------|
| Cl2 <sup>1</sup> -Sn1-Cl1 <sup>1</sup> | 90.10(6) | N2-C6                                  | 1.52(2)    |
| Cl2 <sup>1</sup> -Sn1-Cl1              | 89.90(6) | C4-C5                                  | 1.52(2)    |
| Cl2 <sup>1</sup> -Sn1-Cl1              | 89.90(6) | C5-C6                                  | 1.521(15)  |
| Cl2-Sn1-Cl1 <sup>1</sup>               | 89.90(6) | Cl <sup>1</sup> -Sn1-Cl1               | 89.8(2)    |
| Cl2-Sn1-Cl2 <sup>1</sup>               | 180.0    | Cl2-Sn1-Cl1                            | 89.95(17)  |
| Cl3-Sn1-Cl1                            | 88.81(6) | Cl2-Sn1-Cl1 <sup>1</sup>               | 89.95(17)  |
| Cl3 <sup>1</sup> -Sn1-Cl1              | 91.19(6) | Cl3 <sup>1</sup> -Sn1-Cl1              | 88.74(16)  |
| Cl3 <sup>1</sup> -Sn1-Cl1 <sup>1</sup> | 88.81(6) | Cl3 <sup>1</sup> -Sn1-Cl1 <sup>1</sup> | 178.54(17) |
| Cl3-Sn1-Cl1 <sup>1</sup>               | 91.19(6) | Cl3-Sn1-Cl1                            | 178.54(17) |
| Cl3 <sup>1</sup> -Sn1-Cl2 <sup>1</sup> | 89.68(6) | Cl3-Sn1-Cl1 <sup>1</sup>               | 88.74(16)  |
| Cl3-Sn1-Cl2                            | 89.68(6) | Cl3 <sup>1</sup> -Sn1-Cl2              | 89.65(17)  |
| Cl3-Sn1-Cl2 <sup>1</sup>               | 90.32(6) | Cl3-Sn1-Cl2                            | 89.66(17)  |
| Cl3-Sn1-Cl3 <sup>1</sup>               | 180.0    | Cl3-Sn1-Cl3 <sup>1</sup>               | 92.7(2)    |
| C2-C1-Br1                              | 112.0(6) | Cl4-Sn1-Cl1                            | 89.35(17)  |
| C1-C2-C3                               | 111.2(7) | Cl4-Sn1-Cl1 <sup>1</sup>               | 89.35(17)  |
| N1-C3-C2                               | 111.1(6) | Cl4-Sn1-Cl2                            | 179.0(2)   |
|                                        |          | Cl4-Sn1-Cl3 <sup>1</sup>               | 91.03(17)  |
|                                        |          | Cl4-Sn1-Cl3                            | 91.03(17)  |
|                                        |          | C2-C1-Br1                              | 168(4)     |
|                                        |          | C1-C2-C3                               | 115(3)     |
|                                        |          | C2-C3-N1                               | 105(2)     |
|                                        |          | C5-C4- Br2                             | 155(6)     |
|                                        |          | C4-C5-C6                               | 108(3)     |
|                                        |          | N2-C6-C5                               | 111(3)     |

**Table S4** Selected bond lengths /Å and angles/° for compound **2**

| Compound <b>2</b>     |           |                       |           |
|-----------------------|-----------|-----------------------|-----------|
|                       | LTP       |                       | HTP       |
| Sn1-Br1               | 2.573(2)  | Sn1-Br1               | 2.582(5)  |
| Sn1- Br1 <sup>1</sup> | 2.573(2)  | Sn1- Br2 <sup>1</sup> | 2.578(3)  |
| Sn1-Br2               | 2.588(2)  | Sn1-Br2               | 2.578(3)  |
| Sn1- Br2 <sup>1</sup> | 2.588(2)  | Sn1-Br3               | 2.586(5)  |
| Sn1-Br3               | 2.571(2)  | Sn1- Br4 <sup>1</sup> | 2.575(3)  |
| Sn1-Br3 <sup>1</sup>  | 2.571(2)  | Sn1- Br4              | 2.575(3)  |
| Br4-C1                | 1.920(13) | Br5-C3                | 2.303(19) |
| N1-C3                 | 1.462(9)  | N1-C1                 | 1.50(2)   |

|                                         |           |                                         |            |
|-----------------------------------------|-----------|-----------------------------------------|------------|
| C1-C2                                   | 1.539(9)  | C1-C2                                   | 1.484(12)  |
| C2-C3                                   | 1.538(9)  | C2-C3                                   | 1.482(12)  |
| Br1-Sn1- Br1 <sup>1</sup>               | 180.0     | Br6-C4                                  | 2.346(19)  |
| Br1-Sn1- Br2                            | 90.77(7)  | N2-C6                                   | 1.47(2)    |
| Br1 <sup>1</sup> -Sn1- Br2              | 89.23(7)  | C4-C5                                   | 1.47(2)    |
| Br1 <sup>1</sup> -Sn1- Br2 <sup>1</sup> | 90.77(7)  | C5-C6                                   | 1.474(12)  |
| Br1-Sn1- Br2 <sup>1</sup>               | 89.23(7)  | Br1-Sn1- Br3                            | 179.84(16) |
| Br2 <sup>1</sup> -Sn1- Br2              | 180.0     | Br2 <sup>1</sup> -Sn1- Br1              | 89.48(12)  |
| Br3-Sn1-Br1                             | 90.34(8)  | Br2-Sn1- Br1                            | 89.48(12)  |
| Br3 <sup>1</sup> -Sn1- Br1 <sup>1</sup> | 90.34(8)  | Br2 <sup>1</sup> -Sn1- Br2              | 92.14(16)  |
| Br3-Sn1-Br1 <sup>1</sup>                | 89.66(8)  | Br2 <sup>1</sup> -Sn1- Br3              | 90.63(12)  |
| Br3 <sup>1</sup> -Sn1- Br1              | 89.66(8)  | Br2-Sn1- Br3                            | 90.63(12)  |
| Br3-Sn1- Br2 <sup>1</sup>               | 89.89(7)  | Br4 <sup>1</sup> -Sn1- Br1              | 90.01(13)  |
| Br3 <sup>1</sup> -Sn1- Br2 <sup>1</sup> | 90.11(7)  | Br4-Sn1- Br1                            | 90.01(13)  |
| Br3 <sup>1</sup> -Sn1- Br2              | 89.89(7)  | Br4-Sn1- Br2 <sup>1</sup>               | 88.63(12)  |
| Br3-Sn1- Br2                            | 90.11(7)  | Br4 <sup>1</sup> -Sn1- Br2 <sup>1</sup> | 179.07(13) |
| Br3 <sup>1</sup> -Sn1- Br3              | 180.00(7) | Br4-Sn1- Br2                            | 179.07(13) |
| C2-C1-Br4                               | 110.6(9)  | Br4 <sup>1</sup> -Sn1- Br2              | 88.63(12)  |
| C3-C2-C1                                | 111.2(10) | Br4-Sn1- Br3                            | 89.88(11)  |
| N1-C3-C2                                | 111.8(9)  | Br4 <sup>1</sup> -Sn1- Br3              | 89.88(11)  |
|                                         |           | Br4 <sup>1</sup> -Sn1- Br4              | 90.59(16)  |
|                                         |           | C2-C1-N1                                | 107(3)     |
|                                         |           | C1-C2-C3                                | 107(2)     |
|                                         |           | C2-C3-Br5                               | 156(3)     |
|                                         |           | C5-C4- Br6                              | 169(5)     |
|                                         |           | C4-C5-C6                                | 114(3)     |
|                                         |           | N2-C6-C5                                | 111(3)     |
